# Supplementary material for: Molecular identification of hyaluronate lyase, not hyaluronidase, as an intrinsic hyaluronan-degrading enzyme in Clostridium perfringens strain ATCC 13124
Source: PubMed Central journal article supplement (PMC11496695; doi:10.1038/s41598-024-73955-y), 2024-10-22
Supplement: 41598_2024_73955_MOESM1_ESM.pdf [file 41598_2024_73955_MOESM1_ESM.pdf]

## Supplementary Information

### **Molecular identification of hyaluronate lyase, not hyaluronidase, as an intrinsic hyaluronan-degrading enzyme in *Clostridium perfringens* strain ATCC 13124**

Tomoya Kumon<sup>1,2</sup>, Sayoko Oiki<sup>1,2</sup> & Wataru Hashimoto<sup>1</sup>

<sup>1</sup>Laboratory of Basic and Applied Molecular Biotechnology, Division of Food Science and Biotechnology, Graduate School of Agriculture, Kyoto University, Uji, Kyoto 611-0011, Japan

<sup>2</sup>These authors contributed equally to this work.

Correspondence and request for materials should be addressed to W.H. (e-mail: [hashimoto.wataru.8c@kyoto-u.ac.jp](mailto:hashimoto.wataru.8c@kyoto-u.ac.jp)).

**Supplementary Fig. 1** Bacterial GAG degradation, import, and metabolism system.

**Supplementary Fig. 2** Growth profile of *C. perfringens* cells by measuring OD<sub>600</sub> in log<sub>10</sub> form.

**Supplementary Fig. 3** RNA-seq of *C. perfringens*.

**Supplementary Fig. 4** Superimposition of CpeHysA and xanthan lyase.

**Supplementary Table 1** Gene expression of *C. perfringens* through RNAseq.

**Supplementary Table 2** Primers.

# Supplementary Fig. 1

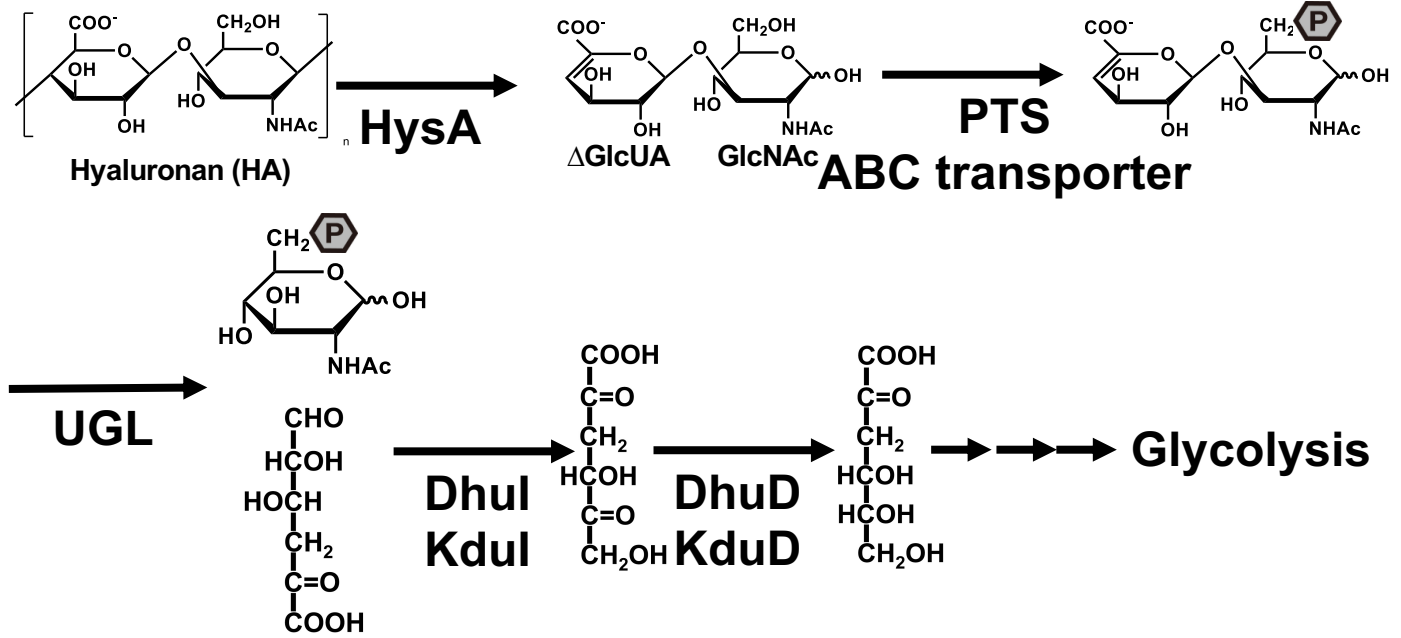

**Supplementary Fig. 1 Bacterial GAG degradation, import, and metabolism system.** Example of degradation enzymes, HysA and UGL; transporter, PTS and ABC transporter (non-phosphorylation of the substrate); metabolizing enzyme, Dhul/Kdul and DhuD/KduD.

## Supplementary Fig. 2

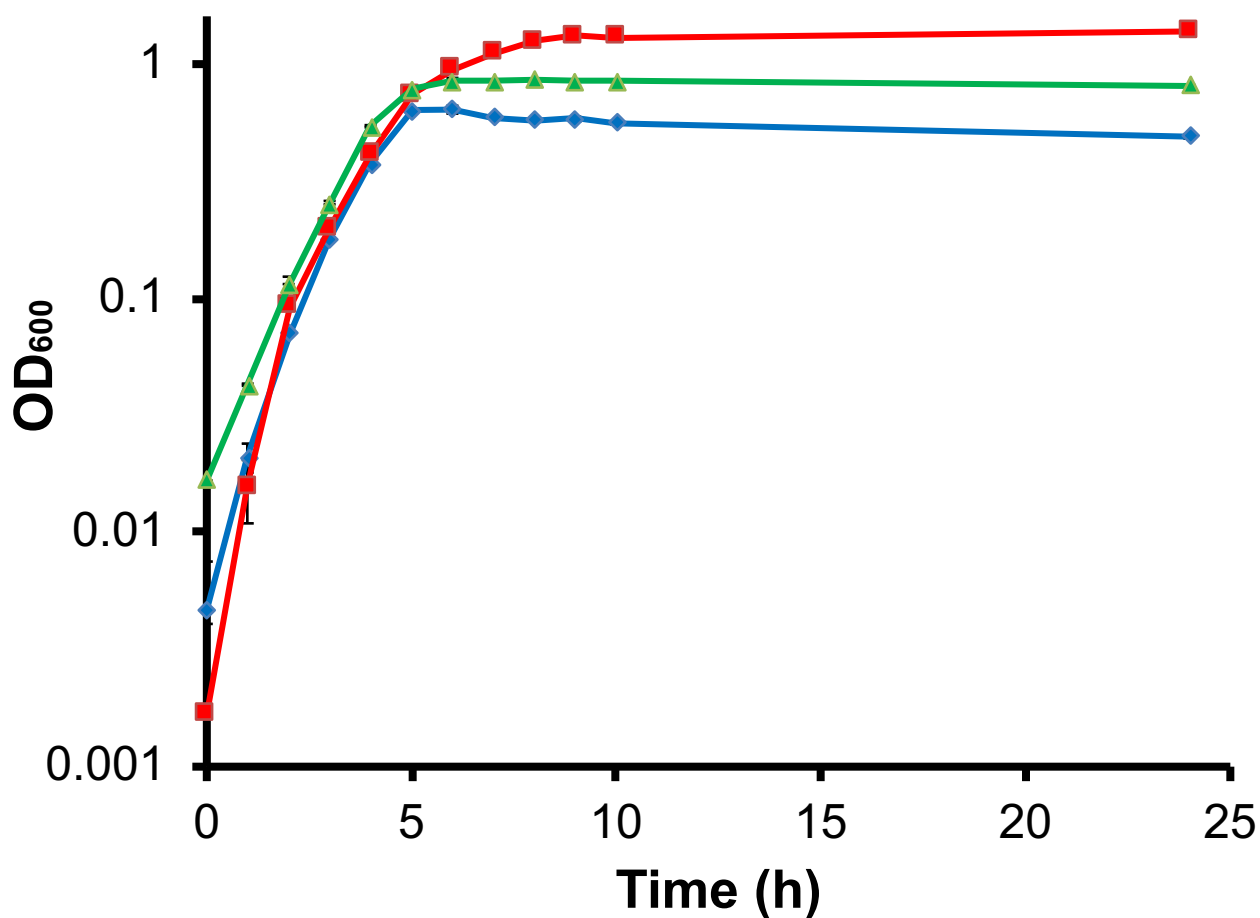

**Supplementary Fig. 2** Growth profile of *C. perfringens* cells by measuring OD<sub>600</sub> in log<sub>10</sub> form. Blue, nutrient-poor medium; red, nutrient-poor medium containing HA; and green, nutrient-poor medium containing mucin. The profile is identical to Fig. 2c.

# Supplementary Fig. 3

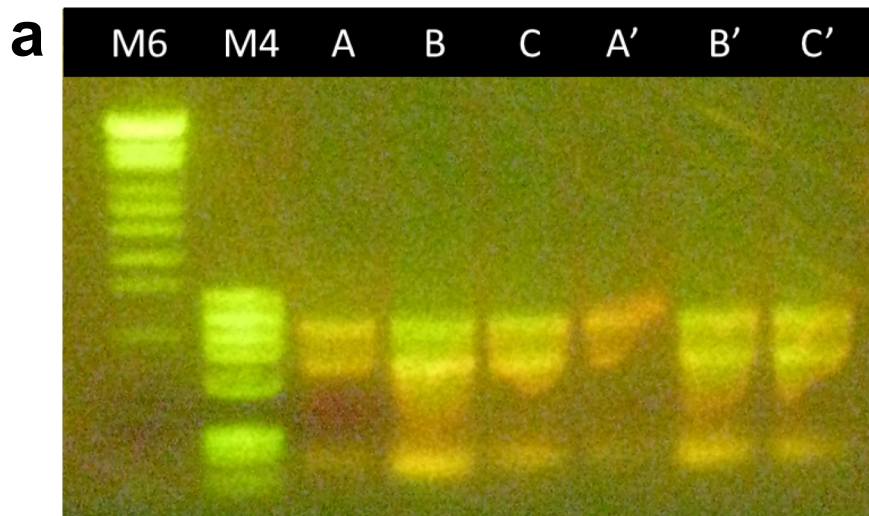

**b**

| No. | growth medium | quantity ( $\mu\text{g}$ ) | ratio(Abs260/Abs280) | RIN | rRNA ratio |
|-----|---------------|----------------------------|----------------------|-----|------------|
| A   | Poor+         | 17.019                     | 1.89                 | 7.2 | 1.1        |
| B   | Poor+HA       | 36.716                     | 1.9                  | 7.3 | 1          |
| C   | Poor+mucin    | 33.961                     | 1.97                 | 7.2 | 1          |

| No. | growth medium | total read bases | total reads |
|-----|---------------|------------------|-------------|
| A   | Poor+         | 5041504082       | 49915882    |
| B   | Poor+HA       | 5041270974       | 49913574    |
| C   | Poor+mucin    | 6955687796       | 68868196    |

| No. | growth medium | total read bases | total reads |
|-----|---------------|------------------|-------------|
| A   | Poor+         | 4955895319       | 49366152    |
| B   | Poor+HA       | 4964571195       | 49416680    |
| C   | Poor+mucin    | 6842367613       | 68121182    |

| No. | growth medium | processed data | mapped read     | failed to aligned | multiple aligned |
|-----|---------------|----------------|-----------------|-------------------|------------------|
| A   | Poor+         | 49366152       | 44776526 90.70% | 2548788 5.16%     | 2040838 4.13%    |
| B   | Poor+HA       | 49416680       | 44736304 90.53% | 2232878 4.52%     | 2447498 4.95%    |
| C   | Poor+mucin    | 68121182       | 60852264 89.33% | 3693250 5.42%     | 3575668 5.25%    |

**Supplementary Fig. 3 RNA-seq of *C. perfringens*.** (a) Extracted RNA was applied to agarose gel electrophoresis. A, A ': Poor + medium B, B': Poor + HA medium C, C ': Poor + mucin medium. (b) Basic statistics of RNA-seq.

# Supplementary Fig. 4

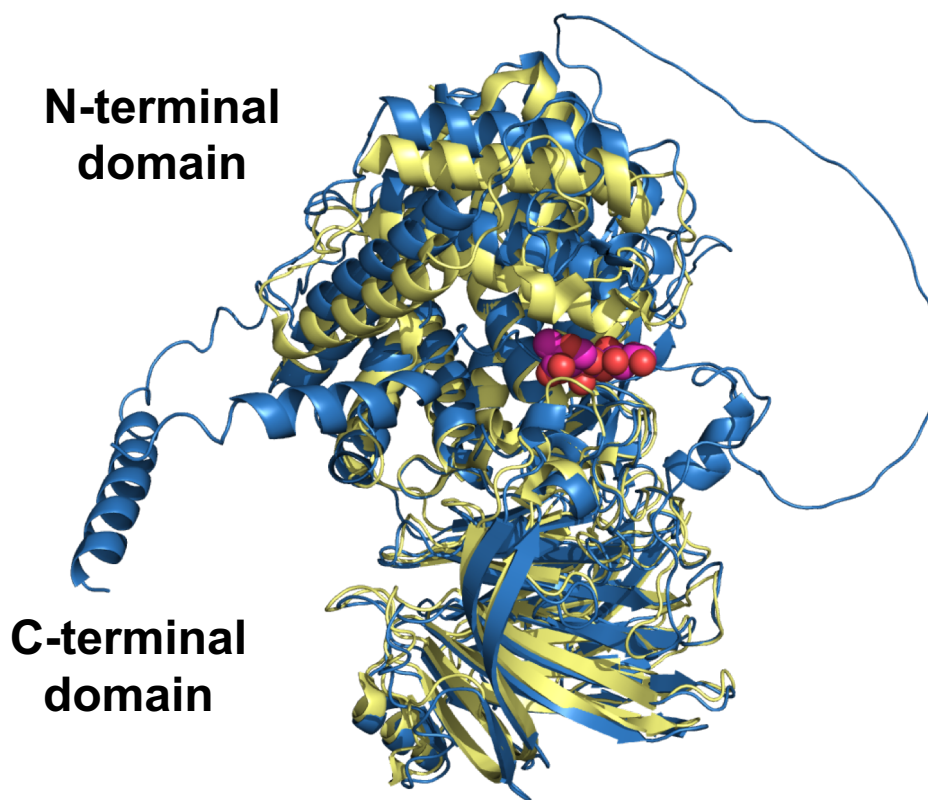

**Supplementary Fig. 4 Superimposition of CpeHysA and xanthan lyase.** Blue, the AlphaFold2 model of CpeHysA; yellow, crystal structure of *Bacillus* sp. GL1 xanthan lyase (PDB ID, 1X1J). Ball model shows xanthan disaccharide.



























## Supplementary Table 2 Primers

| name       | Base sequence (5'-3')                                | Fragment length |
|------------|------------------------------------------------------|-----------------|
| F-CPF_0394 | 5'-AAGGAGATATAC <u>CATATG</u> AAAGAATCTAGAAAAAAC-3'  | 3039 bp         |
| R-CPF_0394 | 5'-GGTGGTGGTGCT <u>CGAGT</u> TTTTTCTTTTCTTAGTAAAC-3' |                 |
